# Supplementary material for: Deciphering pathological behavior of pediatric medullary thyroid cancer from single-cell perspective
Source: PeerJ. 2023 Sep 20;11:e15546. doi: 10.7717/peerj.15546 (PMC10517655; doi:10.7717/peerj.15546)
Supplement: Table S1 [file peerj-11-15546-s004.xlsx]

## Sheet: module_A_gene
	T499C_Ccell_v4	T499C_Ccell_v7	sum
CALCA	0	0.288908	0.288908
SST	0	0.188189	0.188189
TFF3	0	0.172481	0.172481
S100A6	0	0.160615	0.160615
EEF1A1	0.15374	0	0.15374
GAPDH	0.150027	0	0.150027
TPT1	0.148827	0	0.148827
FTH1	0.14881	0	0.14881
TMSB10	0.13769	0	0.13769
B2M	0	0.136995	0.136995
SCG3	0	0.131667	0.131667
EIF1	0.129577	0	0.129577
ATP5F1E	0	0.12947	0.12947
ACTG1	0.12744	0	0.12744
SEC11C	0	0.126524	0.126524
SCG5	0	0.118803	0.118803
GNAS	0	0.117336	0.117336
NACA	0.112813	0	0.112813
PCSK1N	0	0.111683	0.111683
CHGB	0	0.108354	0.108354
NPM1	0.106519	0	0.106519
S100A4	0	0.102197	0.102197
ACTB	0.0996773	0	0.0996773
SCG2	0	0.0987512	0.0987512
BEX1	0	0.0978777	0.0978777
QPCT	0	0.0975515	0.0975515
PPIA	0	0.0973961	0.0973961
PENK	0	0.0961283	0.0961283
CHCHD2	0	0.0953431	0.0953431
HSP90AA1	0	0.0940281	0.0940281
KLK11	0	0.093579	0.093579
ZFAS1	0.0929957	0	0.0929957
MYL6	0	0.0928349	0.0928349
CALM1	0	0.0928116	0.0928116
VIM	0.0926334	0	0.0926334
CYSTM1	0	0.0924263	0.0924263
CPE	0	0.0915747	0.0915747
DSTN	0	0.0903564	0.0903564
CALM2	0	0.0876405	0.0876405
AKR7A3	0	0.0860909	0.0860909
LGALS1	0.0858067	0	0.0858067
NSG2	0	0.0857779	0.0857779
IGFBP7	0	0.0854529	0.0854529
PTMS	0	0.0822275	0.0822275
ATP5MG	0	0.0816916	0.0816916
HSPA8	0	0.0816322	0.0816322
ENO1	0.0809632	0	0.0809632
GABARAPL2	0	0.0809296	0.0809296
UBA52	0.0803177	0	0.0803177
MINOS1	0	0.0802508	0.0802508

## Sheet: module_B_gene
	T499L_Ccell_v9	T499L_Ccell_v3	T499L_Ccell_v8	T499C_Ccell_v2	T499C_Ccell_v9	T499C_Ccell_v1	sum
H3F3A	0	0.0875044	0	0	0.0782622	0	0.165767
S100A6	0	0.150139	0	0	0	0	0.150139
GAPDH	0	0.1279	0	0	0	0	0.1279
FTH1	0	0.126427	0	0	0	0	0.126427
TFF3	0	0.120942	0	0	0	0	0.120942
CCND1	0	0.0615515	0	0	0.0546976	0	0.116249
ATP5F1E	0	0.115148	0	0	0	0	0.115148
PTMA	0	0.107693	0	0	0	0	0.107693
COX7C	0	0.107004	0	0	0	0	0.107004
GNAS	0	0.0999558	0	0	0	0	0.0999558
SERF2	0	0.0980746	0	0	0	0	0.0980746
PPIA	0	0	0.098038	0	0	0	0.098038
RACK1	0	0	0.0947611	0	0	0	0.0947611
CHCHD2	0	0.0912041	0	0	0	0	0.0912041
OST4	0	0.0902277	0	0	0	0	0.0902277
HINT1	0	0	0.0898663	0	0	0	0.0898663
MINOS1	0	0.0855121	0	0	0	0	0.0855121
COX8A	0	0.0852429	0	0	0	0	0.0852429
TUBA1B	0	0	0.0850205	0	0	0	0.0850205
FABP5	0	0.0845155	0	0	0	0	0.0845155
CFL1	0	0.0835238	0	0	0	0	0.0835238
UCHL1	0	0	0.0833321	0	0	0	0.0833321
SELENOW	0	0.0832997	0	0	0	0	0.0832997
H3F3B	0	0	0.082796	0	0	0	0.082796
ELOB	0.0826484	0	0	0	0	0	0.0826484
GABARAPL2	0	0.082003	0	0	0	0	0.082003
ATP5MD	0	0.0806647	0	0	0	0	0.0806647
ATP5ME	0	0.0803561	0	0	0	0	0.0803561
UBL5	0	0.0790432	0	0	0	0	0.0790432
COX6C	0	0	0.0777052	0	0	0	0.0777052
BTF3	0.0774446	0	0	0	0	0	0.0774446
PTMS	0	0	0.0770155	0	0	0	0.0770155
AKR7A3	0.0769584	0	0	0	0	0	0.0769584
S100A10	0	0	0.0766886	0	0	0	0.0766886
KRT18	0	0	0.0765555	0	0	0	0.0765555
COX4I1	0	0.0756902	0	0	0	0	0.0756902
UQCRQ	0	0.0742766	0	0	0	0	0.0742766
PEBP1	0	0	0.0740307	0	0	0	0.0740307
ATP5PF	0	0	0.0730765	0	0	0	0.0730765
PRDX2	0.0709738	0	0	0	0	0	0.0709738
HSP90AB1	0	0	0.070815	0	0	0	0.070815
EIF4A2	0	0.0704915	0	0	0	0	0.0704915
CHGB	0	0	0.0700676	0	0	0	0.0700676
UQCRB	0	0.0693394	0	0	0	0	0.0693394
SLIRP	0	0	0.0687067	0	0	0	0.0687067
AKR7A2	0	0.0684199	0	0	0	0	0.0684199
SEC61B	0.0677924	0	0	0	0	0	0.0677924
UQCR11	0	0.0677374	0	0	0	0	0.0677374
PHLDA2	0	0.0663867	0	0	0	0	0.0663867
EEF2	0	0	0	0.0658361	0	0	0.0658361

## Sheet: module_C_gene
	T499C_Ccell_v3	T499L_Ccell_v4	T499C_Ccell_v5	T499L_Ccell_v10	T499C_Ccell_v6	T499L_Ccell_v7	sum
HNRNPA3	0	0	0	0.0388611	0	0	0.0388611
A1BG	0	0	0	0	0	0	0
AASDHPPT	0	0	0	0	0	0	0
ABAT	0	0	0	0	0	0	0
ABCB7	0	0	0	0	0	0	0
ABI2	0	0	0	0	0	0	0
AC100810.1	0	0	0	0	0	0	0
AC244090.1	0	0	0	0	0	0	0
AEBP2	0	0	0	0	0	0	0
AIDA	0	0	0	0	0	0	0
AKR1B1	0	0	0	0	0	0	0
AKR7A2	0	0	0	0	0	0	0
AKR7A3	0	0	0	0	0	0	0
AMMECR1	0	0	0	0	0	0	0
ANAPC11	0	0	0	0	0	0	0
ANK1	0	0	0	0	0	0	0
ANP32E	0	0	0	0	0	0	0
AP1S1	0	0	0	0	0	0	0
APEX1	0	0	0	0	0	0	0
APRT	0	0	0	0	0	0	0
ARPC3	0	0	0	0	0	0	0
ASCL1	0	0	0	0	0	0	0
ATP5F1E	0	0	0	0	0	0	0
ATP5MC2	0	0	0	0	0	0	0
ATP5MC3	0	0	0	0	0	0	0
ATP5MD	0	0	0	0	0	0	0
ATP5ME	0	0	0	0	0	0	0
ATP5MPL	0	0	0	0	0	0	0
ATP5PD	0	0	0	0	0	0	0
ATP5PF	0	0	0	0	0	0	0
AZIN1	0	0	0	0	0	0	0
BAIAP2L1	0	0	0	0	0	0	0
BCL2L13	0	0	0	0	0	0	0
BEX2	0	0	0	0	0	0	0
BLOC1S6	0	0	0	0	0	0	0
BNIP3	0	0	0	0	0	0	0
BTF3	0	0	0	0	0	0	0
BUD31	0	0	0	0	0	0	0
C12orf73	0	0	0	0	0	0	0
C12orf75	0	0	0	0	0	0	0
C16orf45	0	0	0	0	0	0	0
C19orf70	0	0	0	0	0	0	0
CBX5	0	0	0	0	0	0	0
CCND1	0	0	0	0	0	0	0
CCNG2	0	0	0	0	0	0	0
CCNT1	0	0	0	0	0	0	0
CCSER2	0	0	0	0	0	0	0
CD9	0	0	0	0	0	0	0
CDC37L1	0	0	0	0	0	0	0
CDC42	0	0	0	0	0	0	0
