# Supplementary material for: Deciphering pathological behavior of pediatric medullary thyroid cancer from single-cell perspective
Source: PeerJ. 2023 Sep 20;11:e15546. doi: 10.7717/peerj.15546 (PMC10517655; doi:10.7717/peerj.15546)
Supplement: Table S3 [file peerj-11-15546-s006.xlsx]

## Sheet: module_A_gene
	T499C_Tcell_v4	T499C_Tcell_v5	sum
MALAT1	0	0.278065	0.278065
B2M	0	0.211234	0.211234
EEF1A1	0	0.203242	0.203242
TPT1	0	0.198657	0.198657
TMSB4X	0	0.194976	0.194976
TMSB10	0	0.178783	0.178783
JUNB	0	0.177034	0.177034
PTMA	0	0.166449	0.166449
FAU	0	0.163211	0.163211
EIF1	0	0.161599	0.161599
FTH1	0	0.157571	0.157571
HLA.B	0	0.157296	0.157296
HSP90AA1	0	0.153443	0.153443
CXCR4	0.153205	0	0.153205
NACA	0	0.149865	0.149865
BTG1	0.148302	0	0.148302
SARAF	0	0.147222	0.147222
H3F3B	0	0.144131	0.144131
IL7R	0.141028	0	0.141028
HLA.E	0	0.139417	0.139417
RACK1	0	0.138359	0.138359
EEF1B2	0.135552	0	0.135552
HLA.C	0.134033	0	0.134033
JUND	0	0.132041	0.132041
FTL	0.130554	0	0.130554
HLA.A	0.130147	0	0.130147
CALM1	0	0.12797	0.12797
DDX5	0	0.127356	0.127356
NPM1	0.124722	0	0.124722
EEF1D	0.124445	0	0.124445
KLF2	0	0.124231	0.124231
HSPA8	0	0.123221	0.123221
PFDN5	0	0.122942	0.122942
UBB	0	0.120164	0.120164
DNAJA1	0	0.119095	0.119095
TSC22D3	0	0.118753	0.118753
HSP90AB1	0	0.117722	0.117722
ACTB	0.117178	0	0.117178
DNAJB1	0	0.116984	0.116984
UBC	0	0.116873	0.116873
ZNF331	0.116758	0	0.116758
UBA52	0	0.116383	0.116383
ATP5F1E	0.113559	0	0.113559
CD55	0.113038	0	0.113038
ACTG1	0	0.11223	0.11223
ZFP36L2	0.111277	0	0.111277
PABPC1	0.109063	0	0.109063
BTF3	0.108228	0	0.108228
LTB	0	0.108127	0.108127
ITM2B	0	0.107903	0.107903

## Sheet: module_B_gene
	T499C_Tcell_v1	T499C_Tcell_v2	T499C_Tcell_v9	sum
DUSP2	0.110516	0	0	0.110516
CCL5	0.10763	0	0	0.10763
SH3BGRL3	0.0914505	0	0	0.0914505
VIM	0.0909427	0	0	0.0909427
GZMK	0.0893014	0	0	0.0893014
ZFP36	0.0886707	0	0	0.0886707
S100A4	0	0	0.0859075	0.0859075
IL32	0	0	0.0847424	0.0847424
DUSP1	0.0840234	0	0	0.0840234
HSPA1A	0.0837897	0	0	0.0837897
ANXA1	0.0834435	0	0	0.0834435
S100A10	0.0738418	0	0	0.0738418
CCL4	0.0732702	0	0	0.0732702
MYL12B	0.0727194	0	0	0.0727194
GZMA	0.0715198	0	0	0.0715198
S100A6	0.0697392	0	0	0.0697392
RGS1	0	0	0.0696041	0.0696041
HSPA1B	0.0692142	0	0	0.0692142
CST7	0.0684623	0	0	0.0684623
CLIC1	0.0644985	0	0	0.0644985
CLEC2B	0.0642274	0	0	0.0642274
KLF6	0.0631817	0	0	0.0631817
CYBA	0.0604564	0	0	0.0604564
RARRES3	0.0604067	0	0	0.0604067
CRIP1	0.0596024	0	0	0.0596024
CD44	0.0588745	0	0	0.0588745
CD27	0	0.0574357	0	0.0574357
CTLA4	0	0	0.0570584	0.0570584
COTL1	0	0.0546159	0	0.0546159
S100A11	0.0526725	0	0	0.0526725
CORO1B	0	0.0524486	0	0.0524486
SAMSN1	0	0	0.0522488	0.0522488
BATF	0	0	0.0521747	0.0521747
EMP3	0.05157	0	0	0.05157
RGS2	0	0.0514116	0	0.0514116
CARD16	0	0	0.0504873	0.0504873
CIB1	0.0504844	0	0	0.0504844
TIGIT	0	0	0.0499205	0.0499205
PSMB9	0.0489242	0	0	0.0489242
CTSC	0	0	0.0462761	0.0462761
PPP2R5C	0	0.0459881	0	0.0459881
NR3C1	0	0.0456817	0	0.0456817
PIK3R1	0.0453358	0	0	0.0453358
CCL4L2	0.0447798	0	0	0.0447798
CYTOR	0	0	0.0437281	0.0437281
RNF19A	0	0.0435667	0	0.0435667
LCP1	0.0434653	0	0	0.0434653
PLP2	0.0428056	0	0	0.0428056
ITGB1	0.0422732	0	0	0.0422732
CD74	0.0422179	0	0	0.0422179

## Sheet: module_C_gene
	T499C_Tcell_v6	T499C_Tcell_v8	T499L_Tcell_v7	sum
SOX4	0.164652	0	0	0.164652
H3F3A	0.11754	0	0	0.11754
ITM2A	0.117437	0	0	0.117437
CD3D	0.109156	0	0	0.109156
TRBC2	0.0947787	0	0	0.0947787
CD99	0	0.09131	0	0.09131
MYL6	0.0911654	0	0	0.0911654
SERF2	0.0905633	0	0	0.0905633
PFN1	0.0890548	0	0	0.0890548
CFL1	0.0875	0	0	0.0875
SATB1	0.0834523	0	0	0.0834523
HMGB1	0.082575	0	0	0.082575
MZB1	0	0.0817635	0	0.0817635
CHI3L2	0.0775708	0	0	0.0775708
STMN1	0.0765021	0	0	0.0765021
CD1E	0	0.0755182	0	0.0755182
SRP14	0.0749592	0	0	0.0749592
DDIT4	0	0.0726634	0	0.0726634
TFDP2	0	0.0688958	0	0.0688958
CD1B	0	0.0673394	0	0.0673394
RAC2	0.0666415	0	0	0.0666415
AC084033.3	0	0.0666359	0	0.0666359
ID1	0	0.0664715	0	0.0664715
CD2	0.0641812	0	0	0.0641812
TMBIM6	0.0631099	0	0	0.0631099
DNTT	0	0.0593499	0	0.0593499
C9orf16	0.0589694	0	0	0.0589694
PTCRA	0	0.0579907	0	0.0579907
PTP4A2	0	0.0573243	0	0.0573243
ARMH1	0.0571053	0	0	0.0571053
ARPP21	0	0.0558492	0	0.0558492
ELOVL4	0	0.0543482	0	0.0543482
LAT	0.0529983	0	0	0.0529983
SEPT7	0.0528542	0	0	0.0528542
OCIAD2	0.0524595	0	0	0.0524595
ADA	0	0.0522327	0	0.0522327
GNAS	0.0514467	0	0	0.0514467
DAD1	0.0506565	0	0	0.0506565
HNRNPK	0.0497559	0	0	0.0497559
AQP3	0	0.0494658	0	0.0494658
TPM3	0.0491356	0	0	0.0491356
MAL	0	0.0490184	0	0.0490184
MDM4	0	0.0490176	0	0.0490176
CHD1	0	0.0479642	0	0.0479642
VAPA	0.04735	0	0	0.04735
CBX3	0.0464747	0	0	0.0464747
APBB1IP	0	0.0463956	0	0.0463956
H1FX	0	0.0459417	0	0.0459417
CD1A	0	0.045487	8.25738e-05	0.0455696
LUC7L3	0	0.0448803	0	0.0448803
